# Supplementary material for: Polarization-dependent effects in vibrational absorption spectra of 2D finite-size adsorbate islands on dielectric substrates
Source: Royal Society of Chemistry journal article supplement (doi:10.1039/d4cp00860j), 2024-01-01
Supplement: d4cp00860j1.pdf [file d4cp00860j1.pdf]

## Polarization-dependent effects in vibrational absorption spectra of 2D finite-size adsorbate islands on dielectric substrates

Benedikt Zerulla,<sup>1</sup> Marjan Krstić,<sup>2</sup> Shuang Chen,<sup>3</sup> Zairan Yu,<sup>3</sup> Dominik Beutel,<sup>2</sup>  
Christof Holzer,<sup>2</sup> Markus Nyman,<sup>1</sup> Alexei Nefedov,<sup>3</sup> Yuemin Wang,<sup>3</sup> Thomas G.  
Mayerhöfer,<sup>4</sup> Christof Wöll,<sup>3</sup> and Carsten Rockstuhl<sup>1,2</sup>

<sup>1</sup>*Institute of Nanotechnology, Karlsruhe Institute of Technology (KIT), Kaiserstr. 12,  
76131 Karlsruhe, Germany*

<sup>2</sup>*Institute of Theoretical Solid State Physics, Karlsruhe Institute of Technology (KIT),  
Kaiserstr. 12, 76131 Karlsruhe, Germany*

<sup>3</sup>*Institute of Functional Interfaces, Karlsruhe Institute of Technology (KIT), Kaiserstr. 12,  
76131 Karlsruhe, Germany*

<sup>4</sup>*Leibniz Institute of Photonic Technology, Albert-Einstein-Str. 9, 07745 Jena,  
Germany*

(Dated: 5 April 2024)

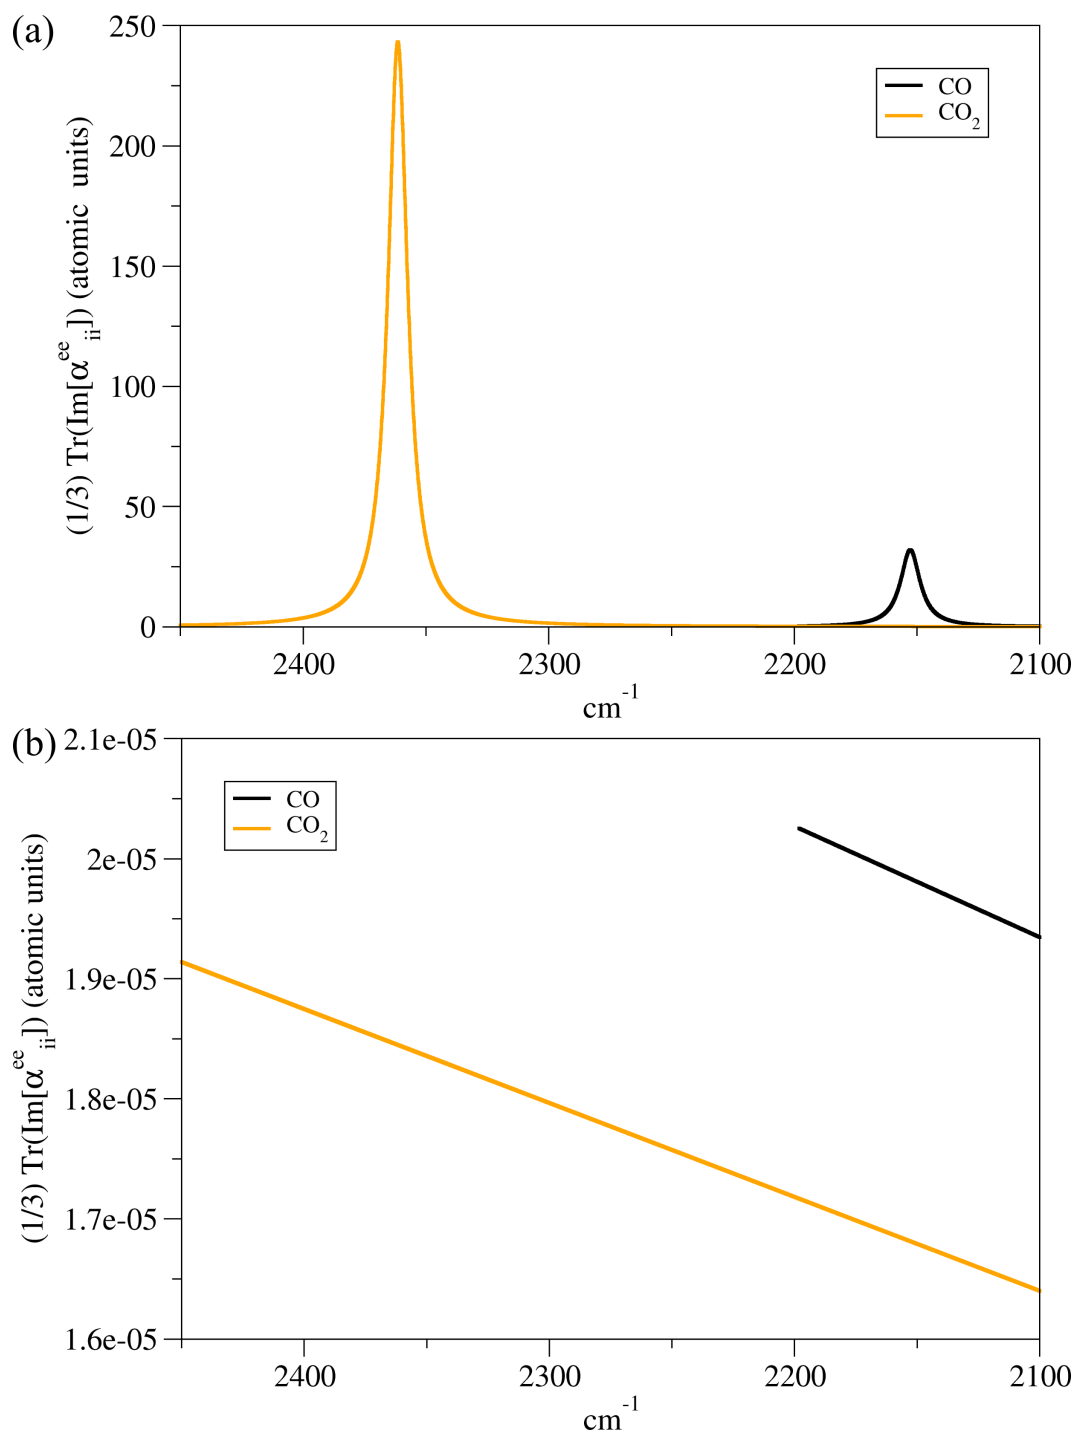

FIG. S1: (a) Visualized IR absorption of the CO and CO<sub>2</sub> molecule simulated from the trace of the calculated vibrational dynamic polarizabilities using DFT method. (b) Electronic absorption of CO and CO<sub>2</sub> molecule in the infra-red part of the spectrum, representing long-range tail of the damped electronic transition in the UV part of the spectrum.

## REFERENCES
